# Supplementary material
Source: PubMed Central journal article supplement (PMC11029141)
Supplement: 262_2014_1634_MOESM1_ESM.pdf [file 262_2014_1634_MOESM1_ESM.pdf]

**a**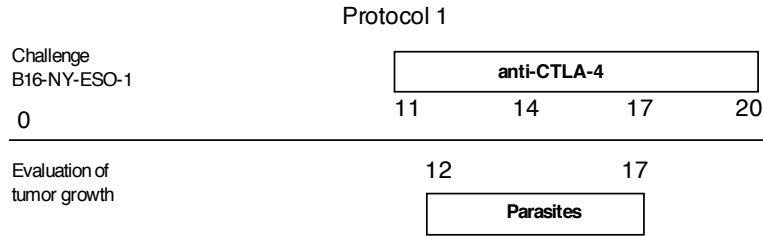**b**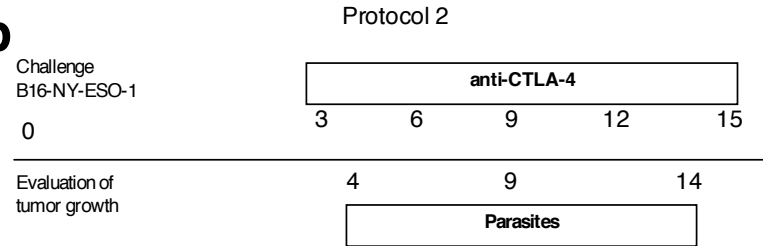

**Supplementary Fig.1. Protocols used to immunotherapy.** To establish subcutaneous tumors, mice received  $5 \times 10^4$  B16-NY-ESO-1 cells (day 0) and the treatment was initiated on day 11 (**a**) or 3 (**b**) depending on the adopted protocol. The anti-CTLA-4 was inoculated every 3 days (100 $\mu$ g, i.p.) and the parasite CL-14-NY-ESO-1 with the interval of 5 days ( $10^7$  trypomastigotes, i.p.).

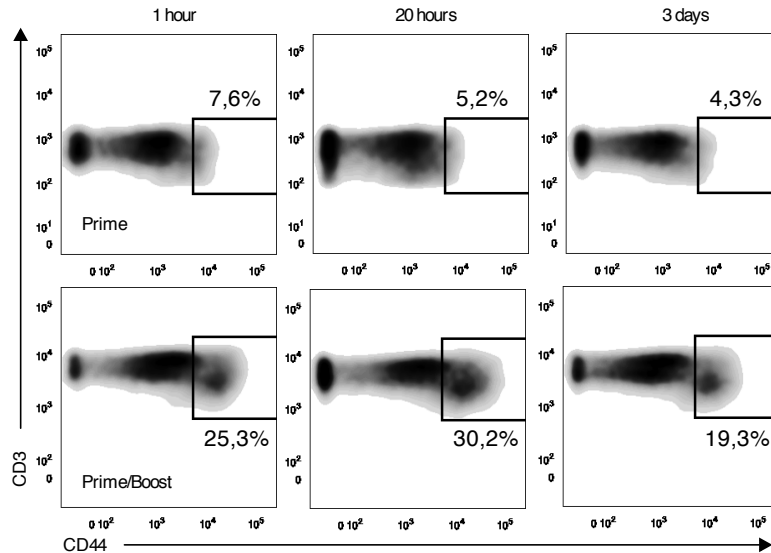

**Supplementary Fig.2. Two doses of CL-14-NY-ESO-1 were sufficient to ensure stimulation of T cells.** The lymph nodes were collected 1 hour or 1 or 3 days after infection with one (upper panels) or two doses (lower panels) of the transgenic parasite and the frequency of stimulated T cells (CD3<sup>+</sup>CD44<sup>High</sup>) was analyzed by flow cytometry.

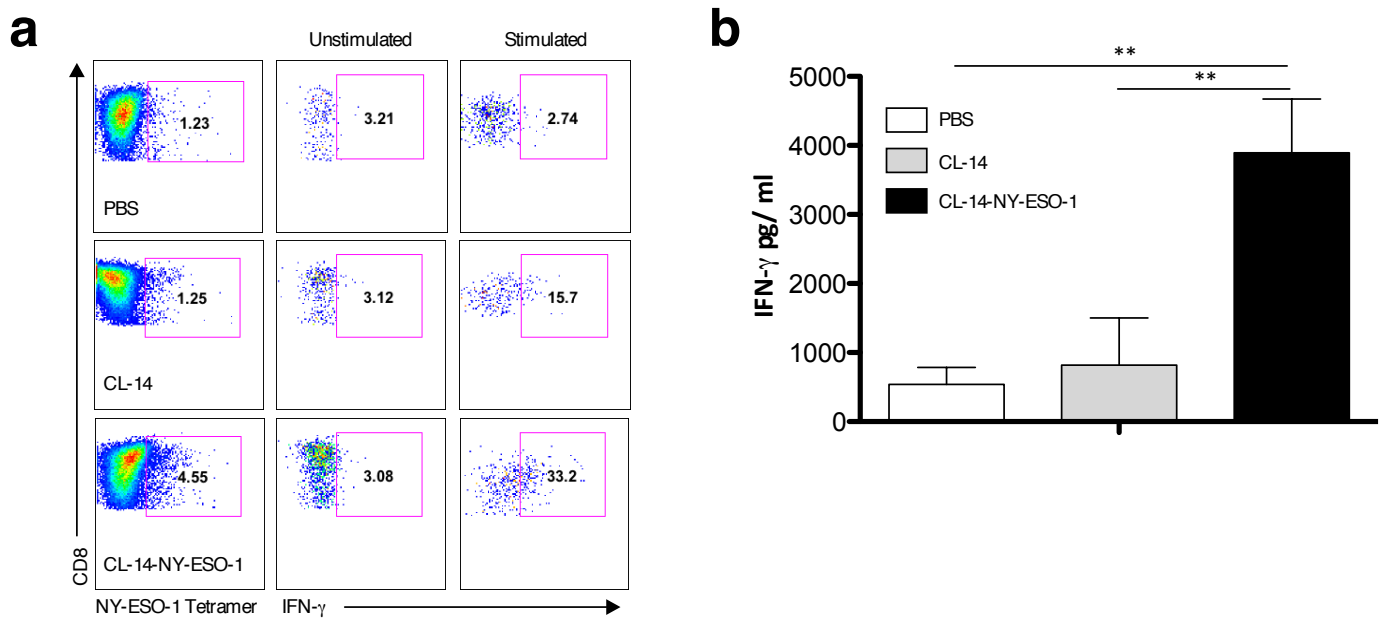

**Supplementary Fig.3. Vaccinations with transgenic parasite induce antitumor-specific immune response.** (a) Representative pseudo-color plots demonstrate NY-ESO-1-specific CD8<sup>+</sup> T cells collected 21 days after the boost, re-stimulated with rNY-ESO-1 and evaluated for their ability to produce IFN- $\gamma$ . (b) Production of IFN- $\gamma$  were assessed in the supernatant after 48h of culture B16-NY-ESO-1 melanoma cells and splenocytes from mice that received two doses of transgenic parasite and had the spleen harvested at day 21 after boost. Control groups received PBS or CL-14 parasites.

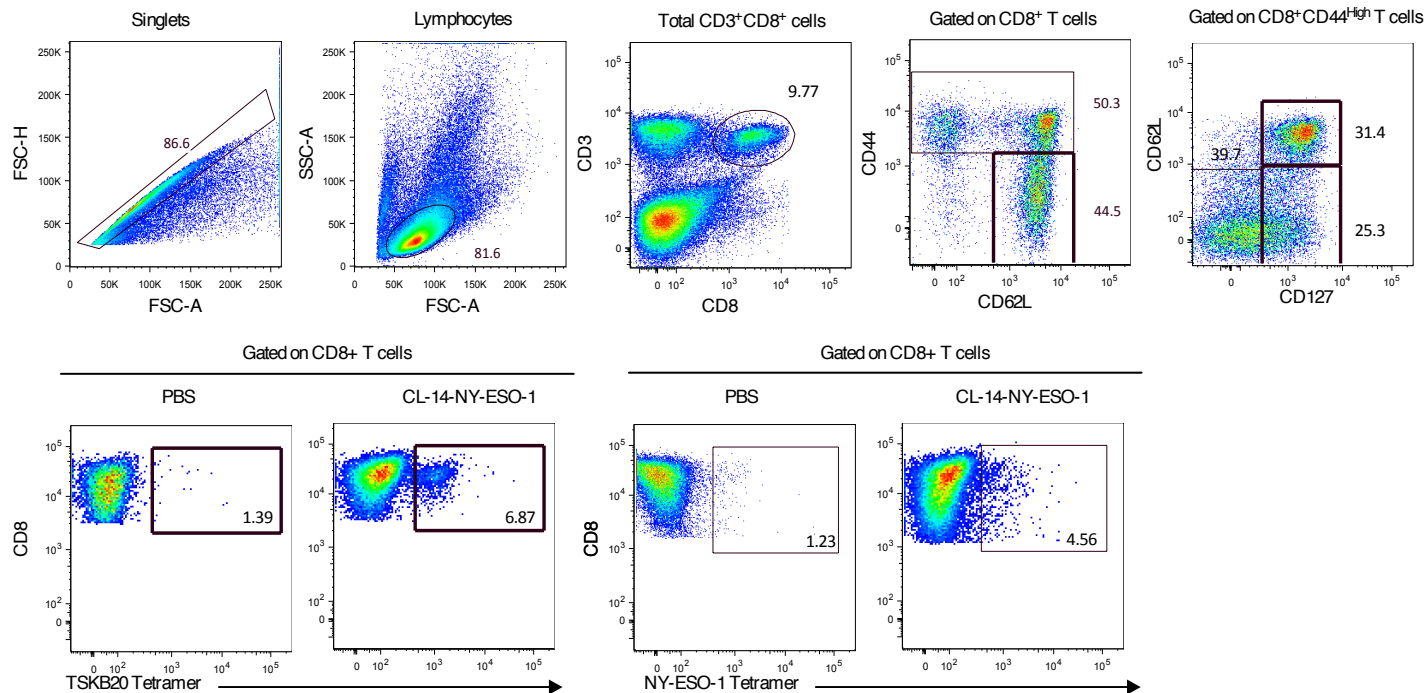

**a**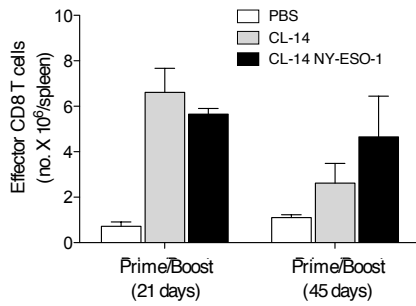**b**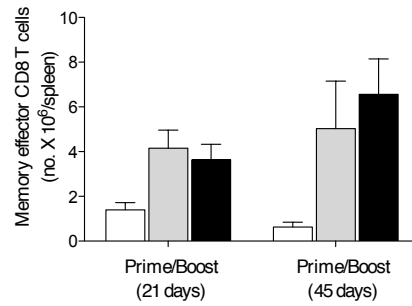**c**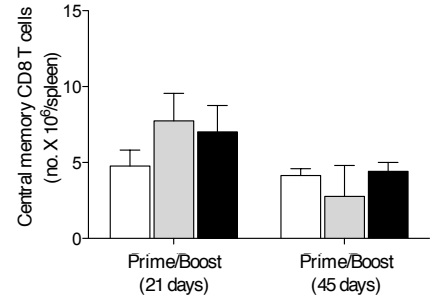

**Supplementary Fig.5. Numbers of effector and memory effector CD8<sup>+</sup> T cells generated with immunization.** Splenocytes were harvested 21 and 45 days after boost vaccination. The markers CD44, CD62L and CD127 were used to define subpopulations within CD3<sup>+</sup>CD8<sup>+</sup> T cells. To evaluate the profile of the activated cells CD44<sup>high</sup> was defined. The subpopulations were depicted: (a) effector (CD62L<sup>Low</sup>CD127<sup>Low</sup>), (b) memory effector (CD62L<sup>Low</sup>CD127<sup>High</sup>) and (c) central memory (CD62L<sup>High</sup>CD127<sup>High</sup>). Similar results were found in three independent experiments with four animals in each group.

**a**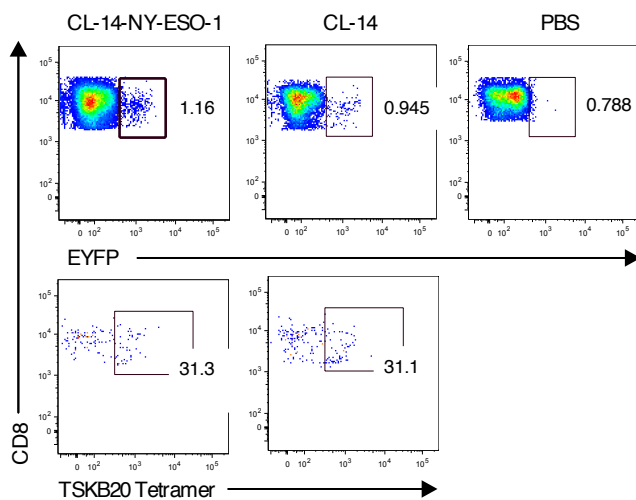**b**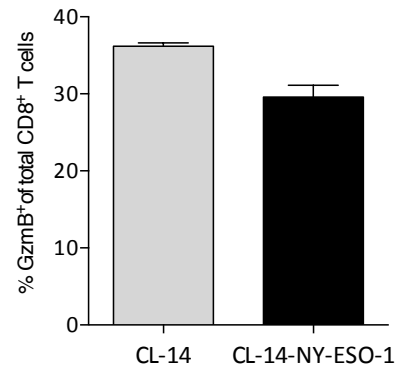

**Supplementary Fig.6. Transgenic parasites were able to induce granzyme B tumor-specific CD8<sup>+</sup> T cells.** gzmBCreERT2/ROSA26EYFP mice were vaccinated with two doses of PBS or the *T. cruzi* strain CL-14 expressing or not expressing NY-ESO-1. Treatment with tamoxifen was performed during 5 days as described in the methods section, and the splenocytes were collected 21 days after the boost vaccination. (a) The expression of EYFP, which is restricted to cells expressing granzyme B (gzmB), was used for gating (upper panels). Parasite-specific cells stained with the TSKB20 tetramer were assessed on the gate of CD8<sup>+</sup>EYFP<sup>+</sup> cells. (b) To confirm the expression of gzmB induced by transgenic parasite, C57BL/6 were vaccinated with the same protocol and the expression of gzmB were evaluated using a monoclonal antibody for this protein.

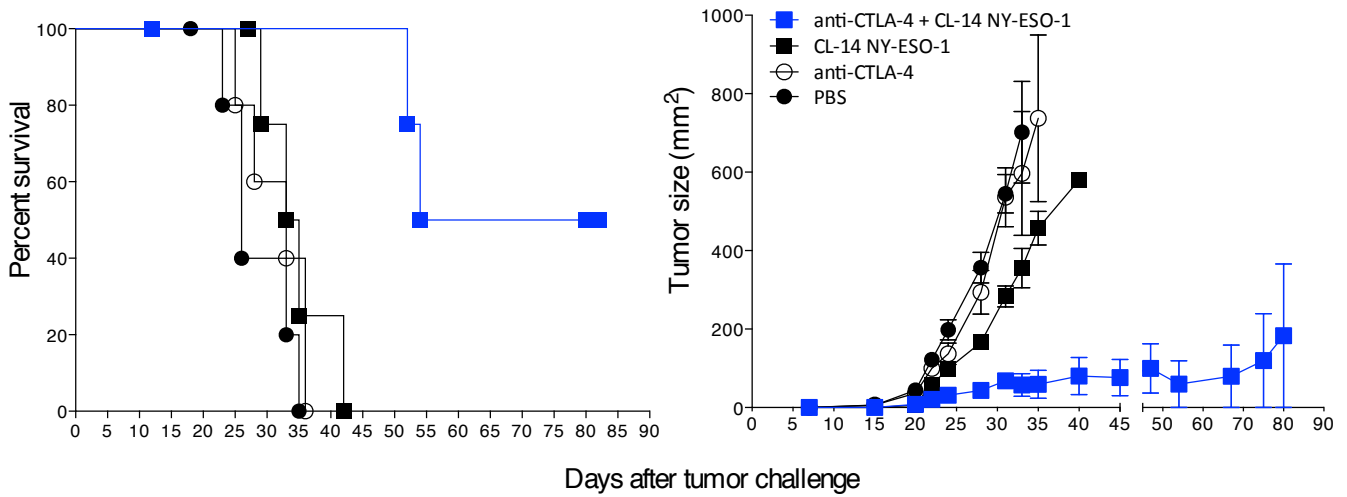

**Supplementary Fig.7. Immunotherapy with anti-CTLA-4/CL14-NY-ESO-1 controls tumor growth.** For the therapeutic vaccination, the mice were subjected to the treatment starting on day 3 after challenge with B16-NY-ESO-1 melanoma cells and the tumor growth and survival were monitored for 84 days.

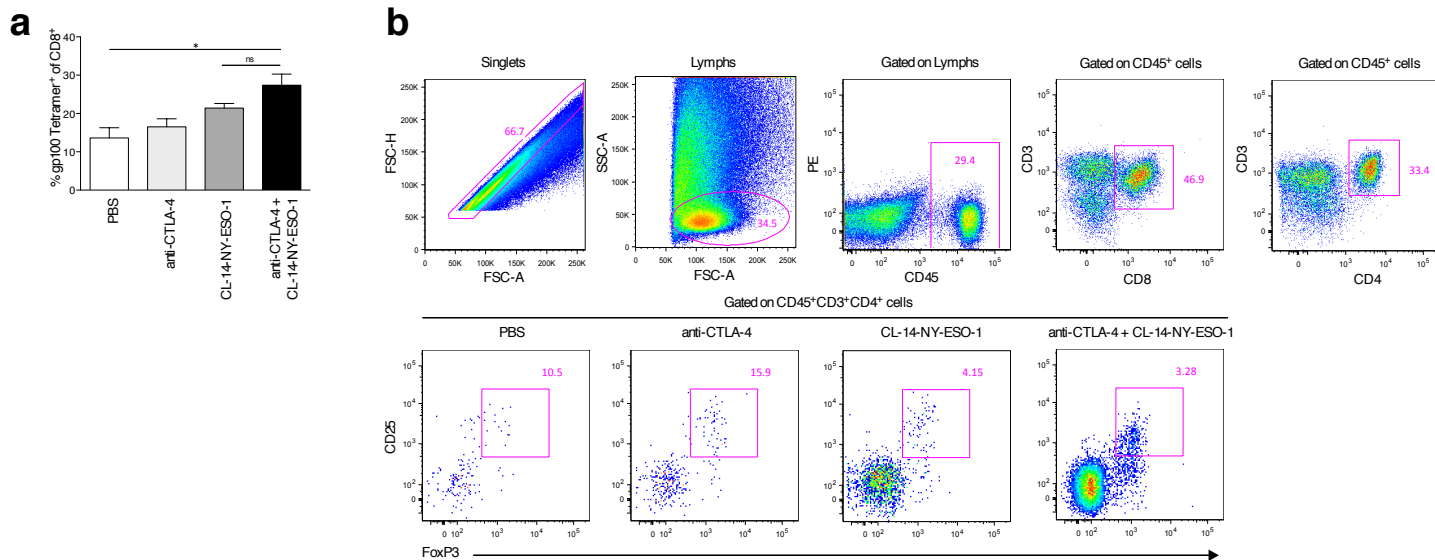

**Supplementary Fig.8. Treatment with anti-CTLA-4/CL14-NY-ESO-1 enhanced antitumor immune response.** C57BL/6 mice were challenged with B16-NY-ESO-1 cells. (a) After 28 days, splenocytes were harvested and specificity to melanocytic cells was determined using gp100. (b) The gate strategy used to the analysis in the tumor infiltrate was demonstrated on the dotplots.
